# Supplementary material for: Selective synthesis of dimethoxyethane via directly catalytic etherification of crude ethylene glycol
Source: Royal Society of Chemistry journal article supplement (doi:10.1039/c7gc00659d), 2017-01-01
Supplement: c7gc00659d1.pdf [file c7gc00659d1.pdf]

# **ELECTRONIC SUPPLEMENTARY INFORMATION**

## **Selective synthesis of dimethoxyethane via directly catalytic etherification of crude ethylene glycol**

Weiqliang Yu,<sup>a</sup> Fang Lu,<sup>\*a</sup> Qianqian Huang,<sup>a,b</sup> Rui Lu,<sup>a,b</sup> Shuai Chen<sup>a</sup> and Jie Xu<sup>\*a</sup>

<sup>a</sup> State Key Laboratory of Catalysis, Dalian Institute of Chemical Physics, Chinese Academy of Sciences, Dalian National Laboratory for Clean Energy, Dalian 116023, P. R. China.

<sup>b</sup> University of the Chinese Academy of Sciences, Beijing 100049, P. R. China

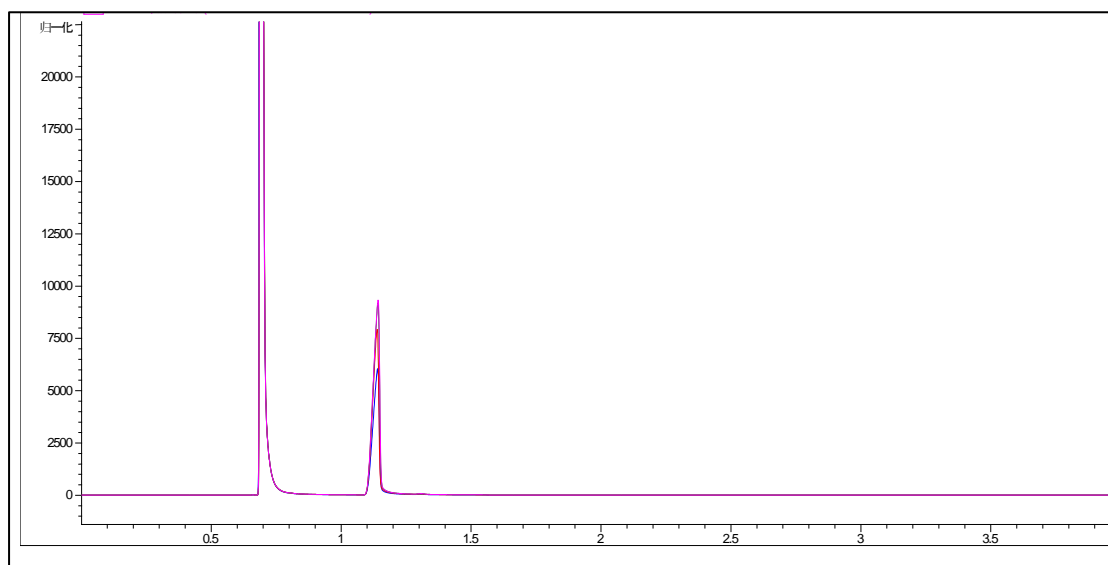

**Figure S1** GC curves for etherification of EG with methanol over  $\text{Ca}(\text{OH})_2$ . Four curves were overlapped, respectively standing for the reaction time of 60, 120, 180 and 240 min. Peaks in 0.7 min and 1.14 min was respectively standing for methanol and ethylene glycol.

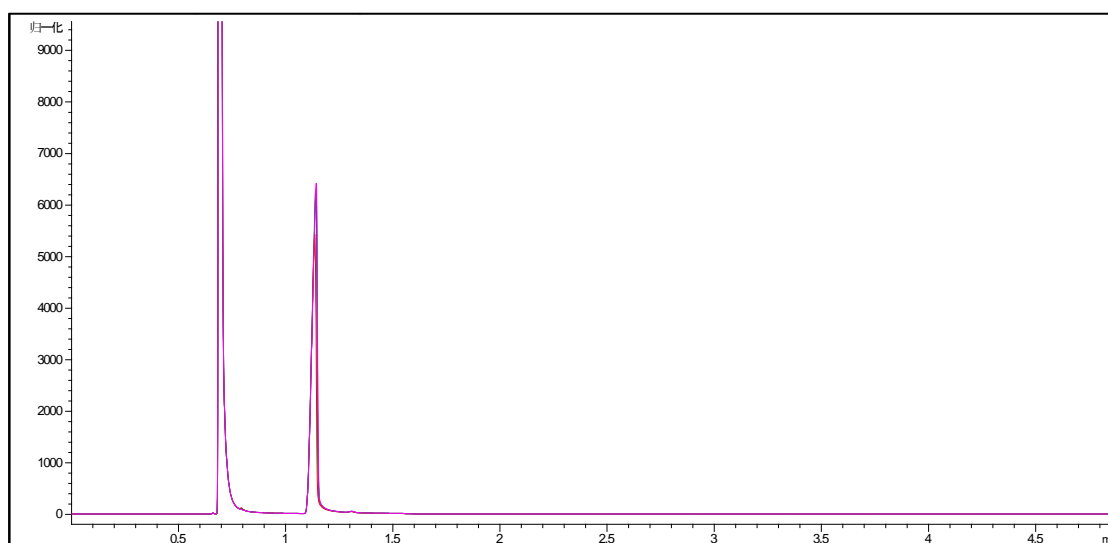

**Figure S2** The continuous producing DME via etherification of EG with methanol over  $\text{Mg}(\text{OH})_2$ . Four curves were overlapped, respectively standing for the reaction time of 60, 120, 180 and 240 min. Peaks in 0.7 min and 1.14 min was respectively standing for methanol and ethylene glycol.

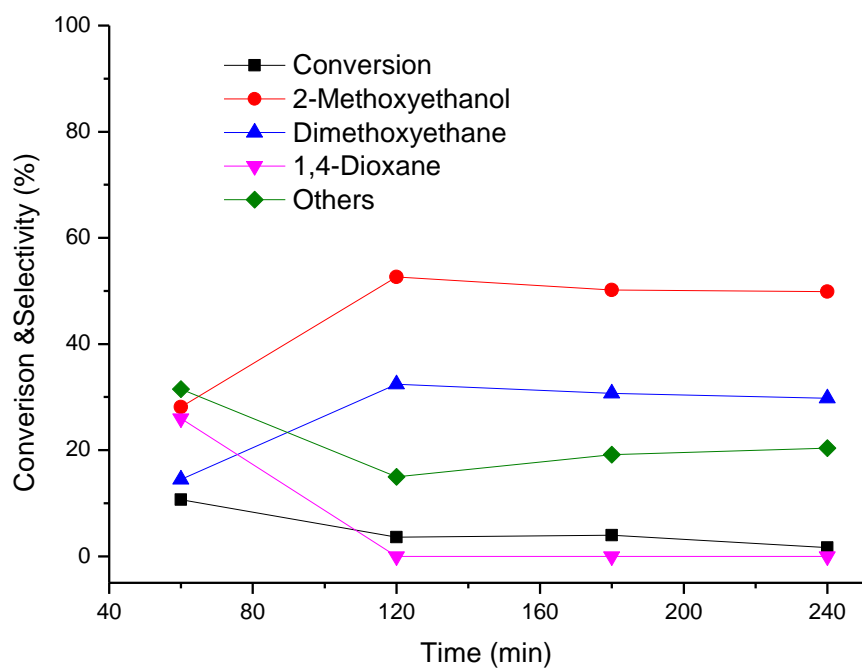

**Figure S3** The continuous producing DME via etherification of EG with methanol over  $\gamma\text{-Al}_2\text{O}_3$

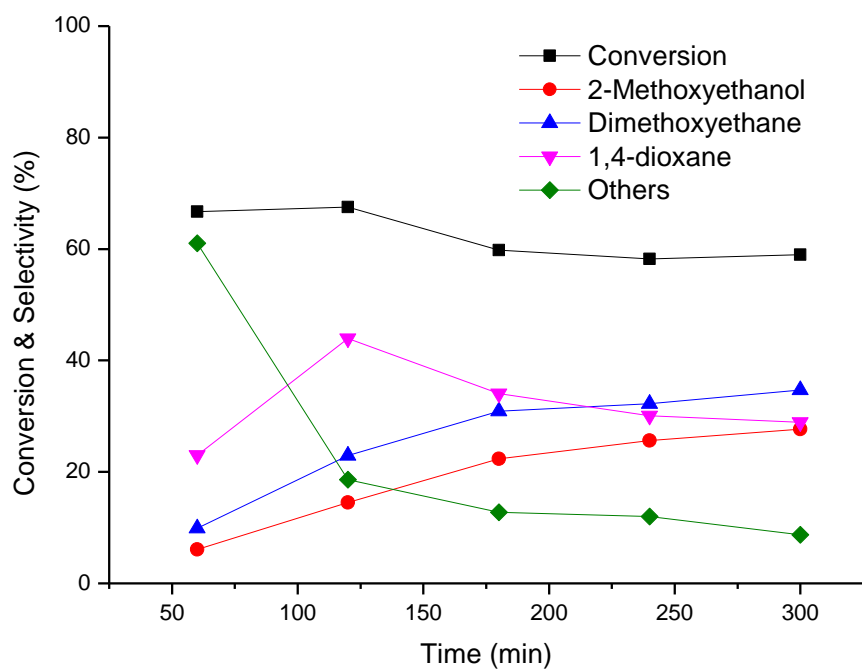

**Figure S4** The continuous producing DME via etherification of EG with methanol over HY(7)

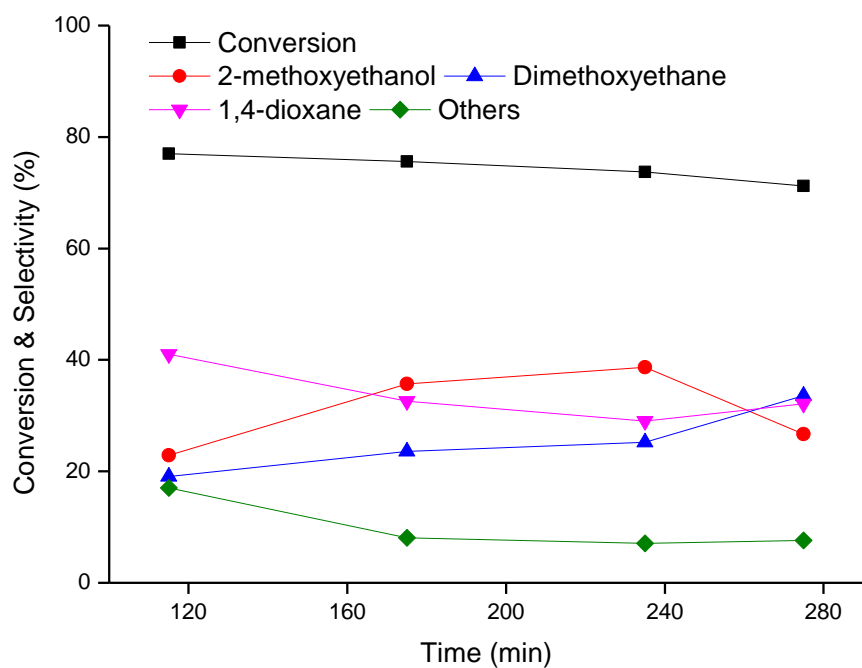

**Figure S5** The continuous producing DME via etherification of EG with methanol over HY (11)

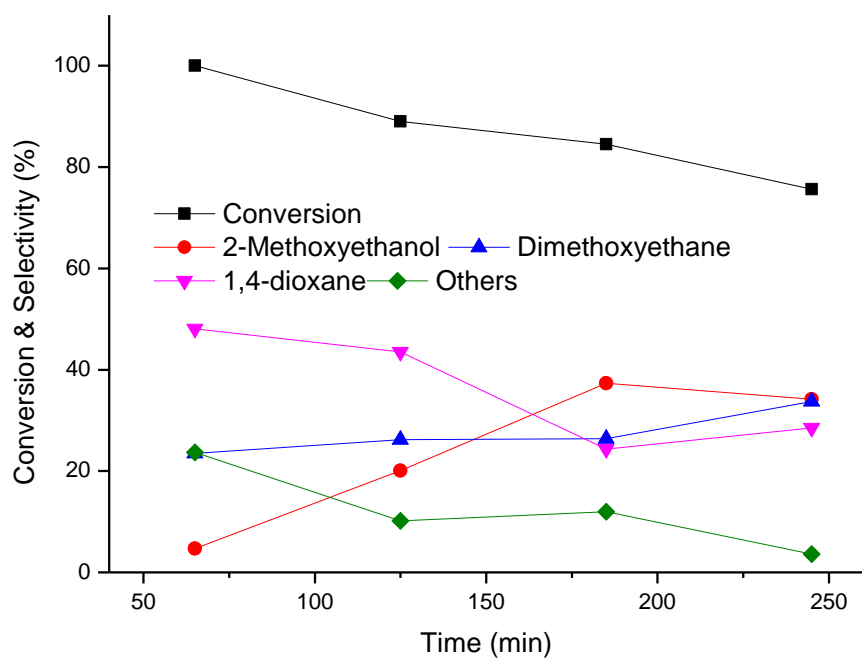

**Figure S6** The continuous producing DME via etherification of EG with methanol over USY(14)

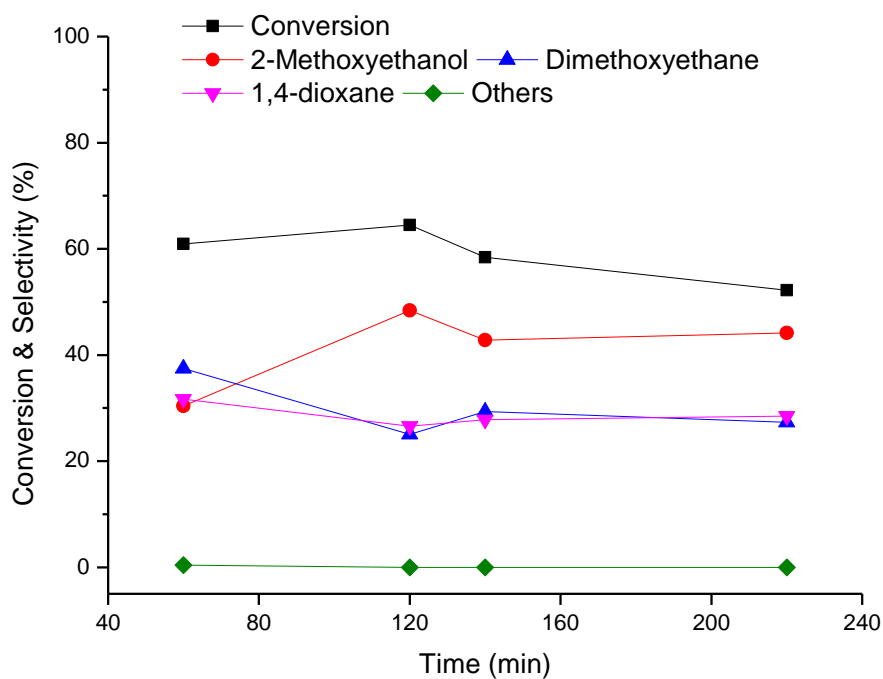

**Figure S7** The continuous producing DME via etherification of EG with methanol over HZSM-5(25)

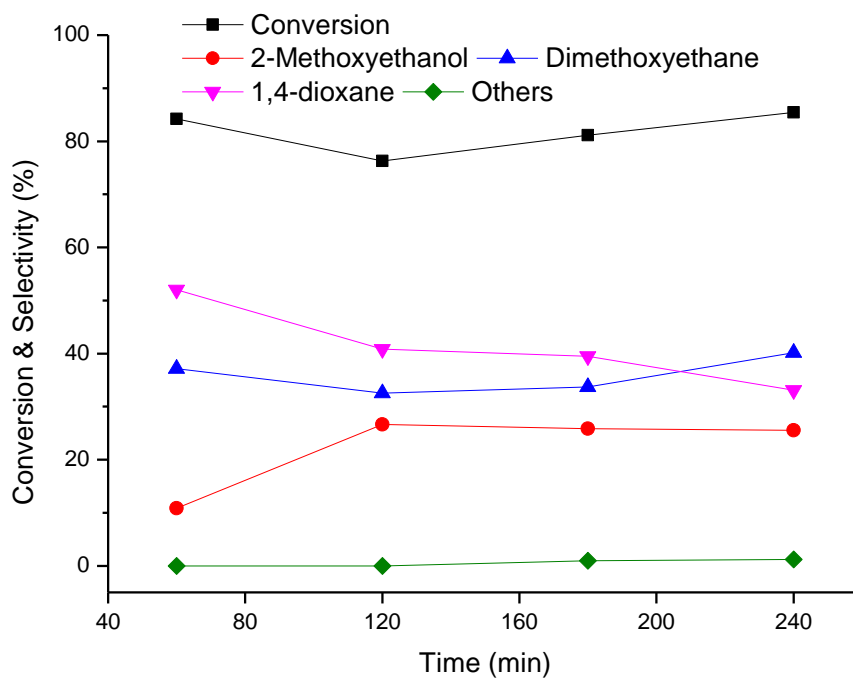

**Figure S8** The continuous producing DME via etherification of EG with methanol over HZSM-5(100)

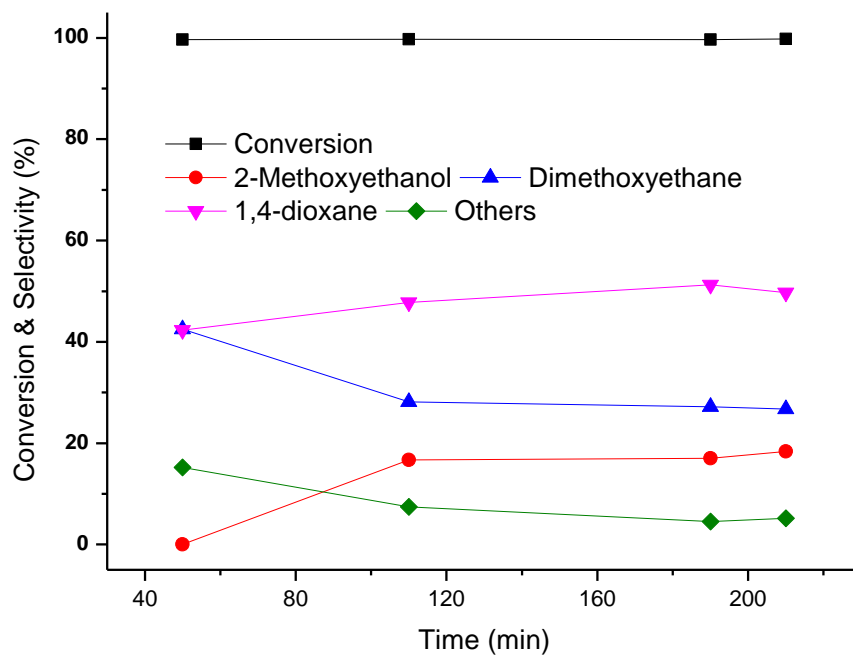

**Figure S9** The continuous producing DME via etherification of EG with methanol over HZSM-5(300)

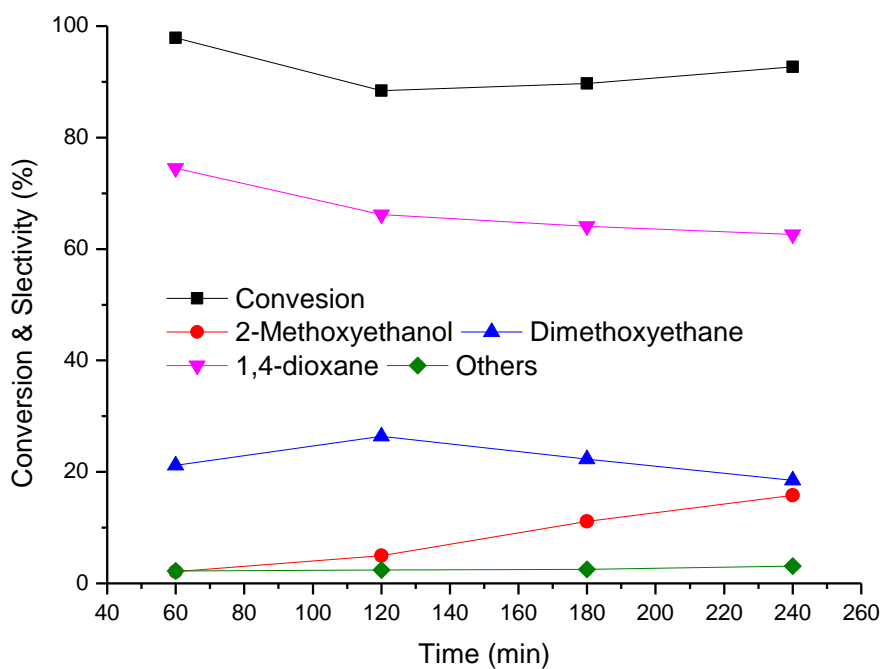

**Figure S10** The continuous producing DME via etherification of EG with methanol over H-Beta (25)

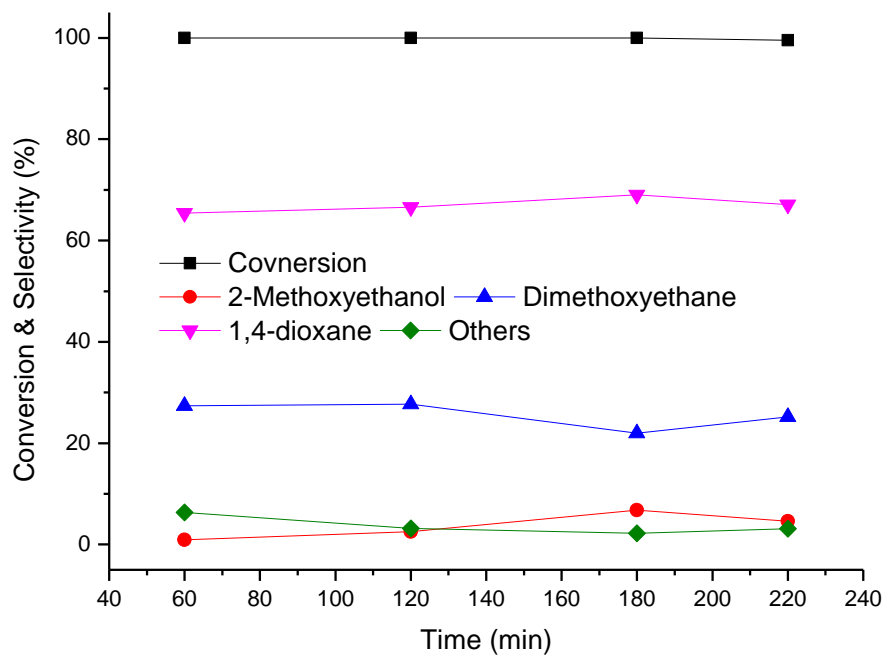

**Figure S11** The continuous producing DME via etherification of EG with methanol over H-Beta (40)

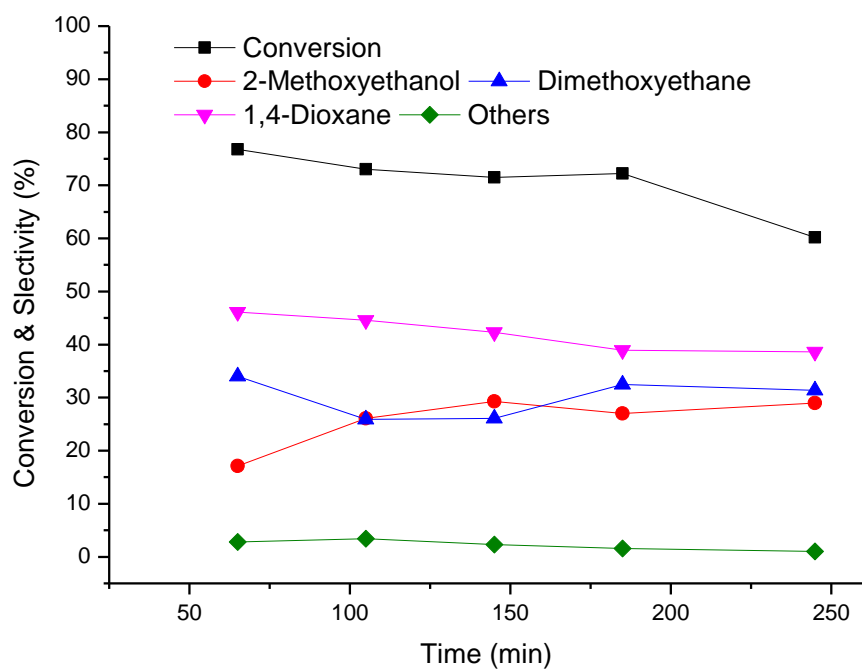

**Figure S12** The continuous producing DME via etherification of EG with methanol over SAPO-11

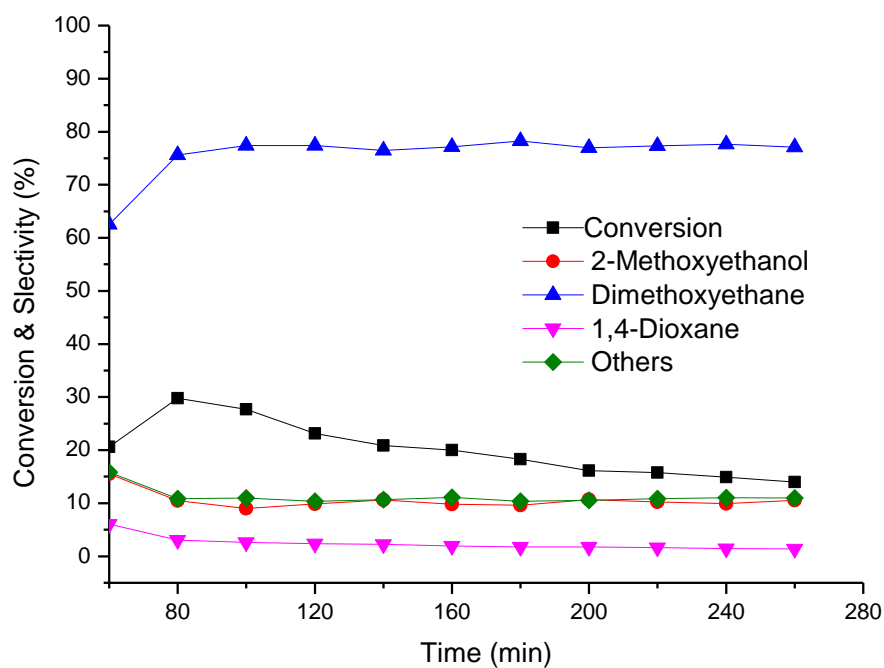

**Figure S13** The continuous producing DME via etherification of EG with methanol over Mordenite

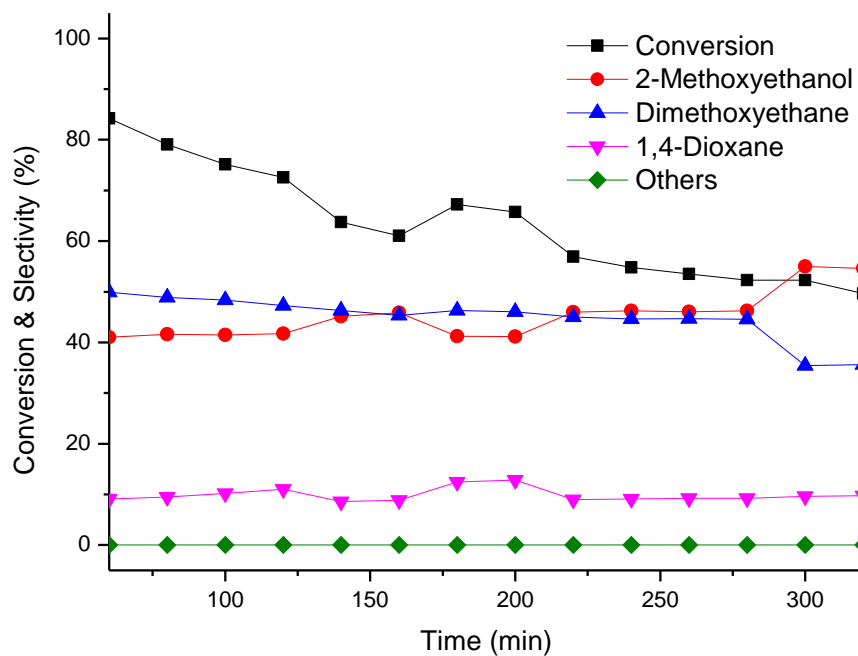

**Figure S14** The continuous producing DME via etherification of EG with methanol over HZSM-35 (30)



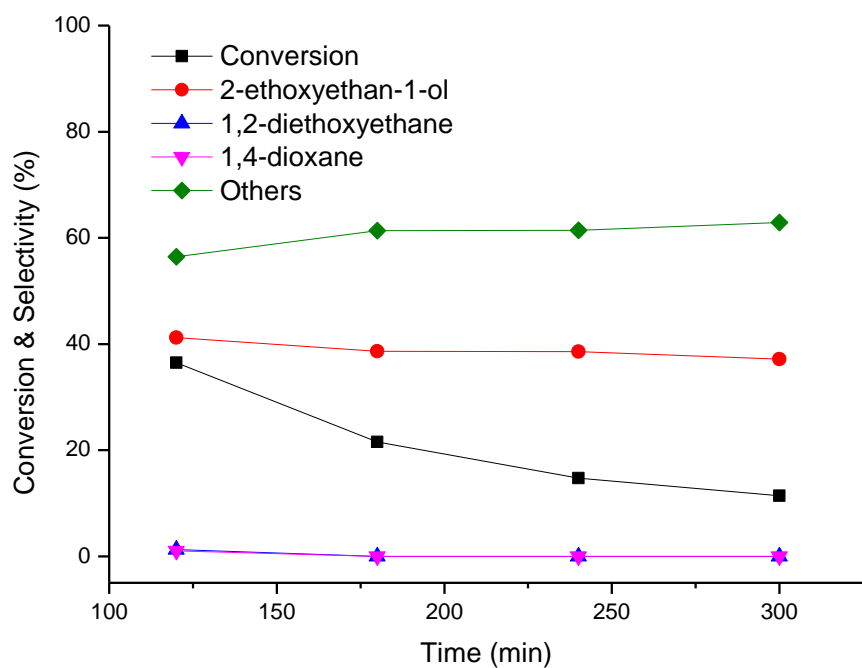

**Figure S15** The continuous producing DME via etherification of EG with ethanol over SAPO-34

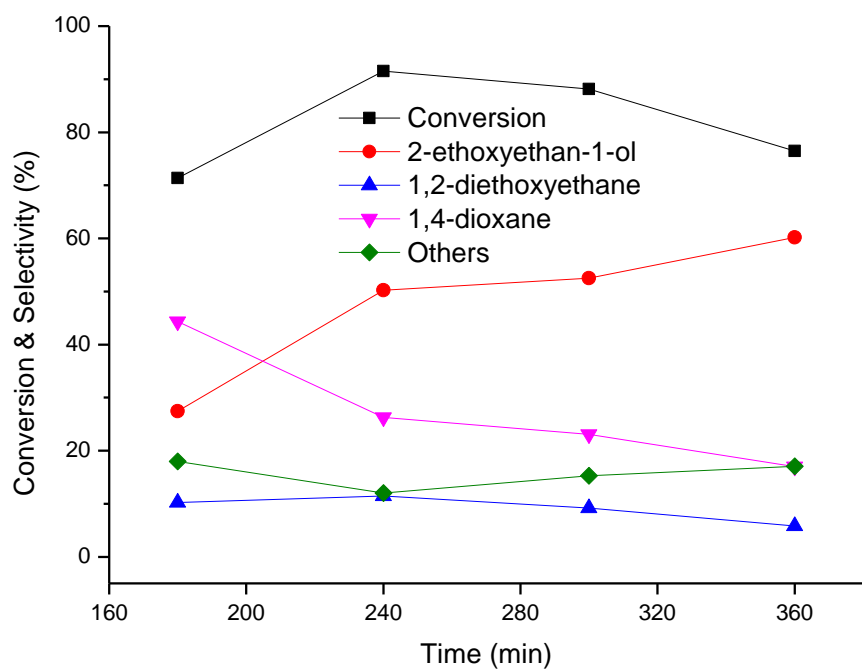

**Figure S16** The continuous producing DME via etherification of EG with ethanol over HY (7)

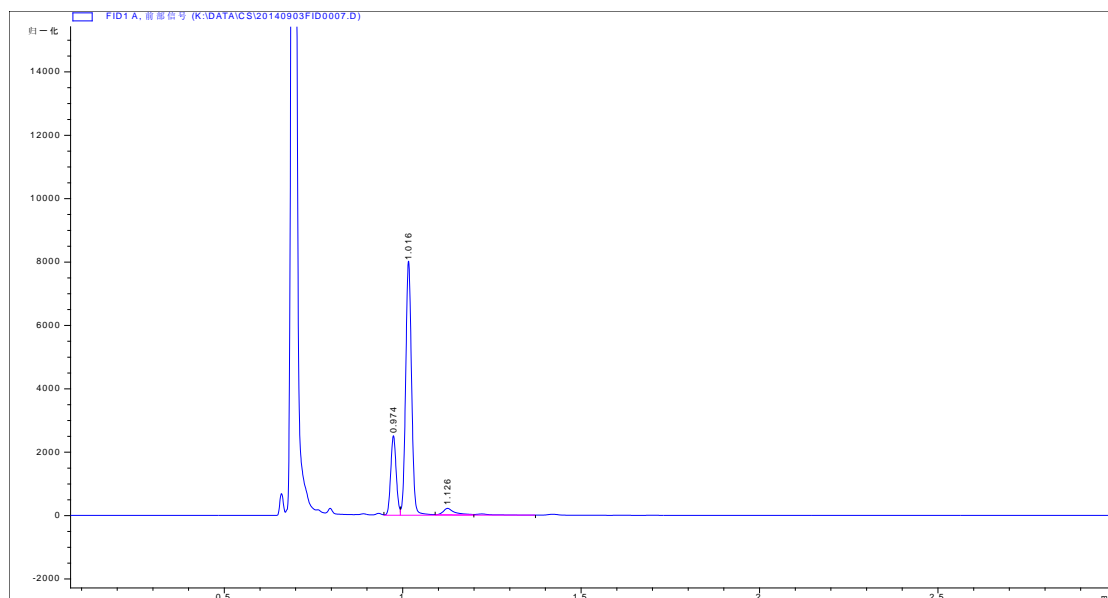

**Figure S17** GC curve for etherification of EG with methanol over SAPO-34. Peaks in 0.97min, 1.02min and 1.13 were respectively standing for 2-methoxyethanol, dimethoxyethane and ethylene glycol. 1,4-dioxane was not detected.

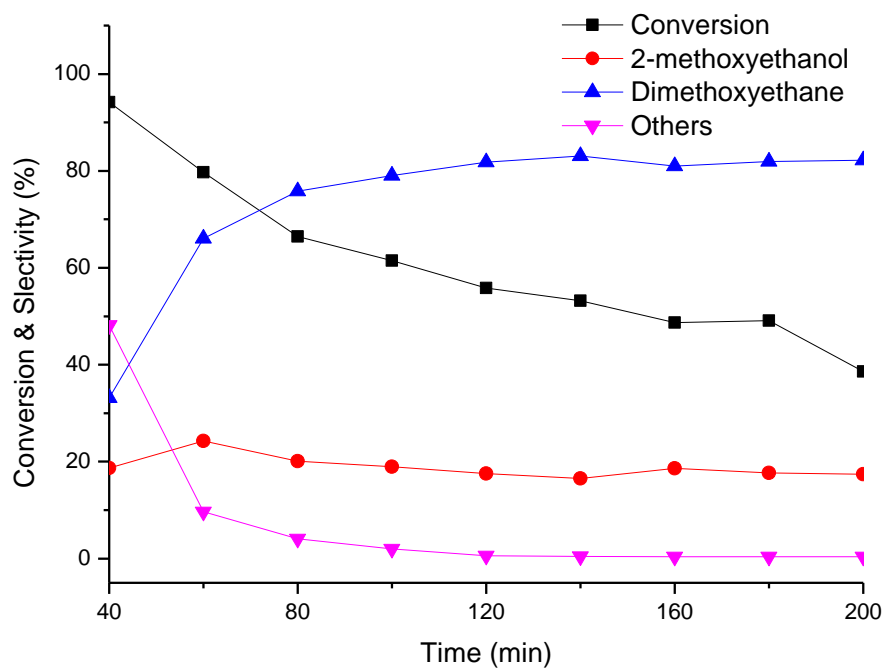

**Figure S18** Catalytic performance of regenerated catalyst in catalytic etherification of EG with methanol. Reaction conditions: 483 K, 0.3 MPa N<sub>2</sub>, LHSV = 1.5 h<sup>-1</sup>.

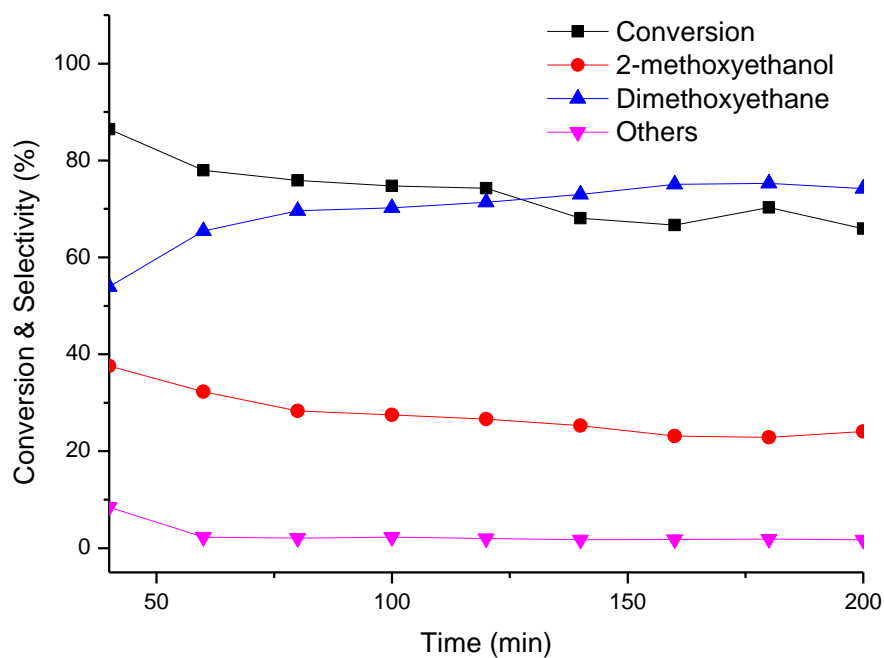

**Figure S19** Catalytic performance of ball-milled catalyst in catalytic etherification of EG with methanol. Reaction conditions: 483 K, 0.3 MPa N<sub>2</sub>, LHSV = 1.5 h<sup>-1</sup>.
